# Supplementary material for: Mutation of DEFECTIVE EMBRYO SAC1 results in a low seed-setting rate in rice by regulating embryo sac development
Source: PubMed Central journal article supplement (PMC10010608; doi:10.1093/jxb/erac506), 2023-01-18
Supplement: erac506_suppl_supplementary_figures_s1-s15_tables_s1-s2.pdf [file erac506_suppl_supplementary_figures_s1-s15_tables_s1-s2.pdf]

1 **Supplementary figures**

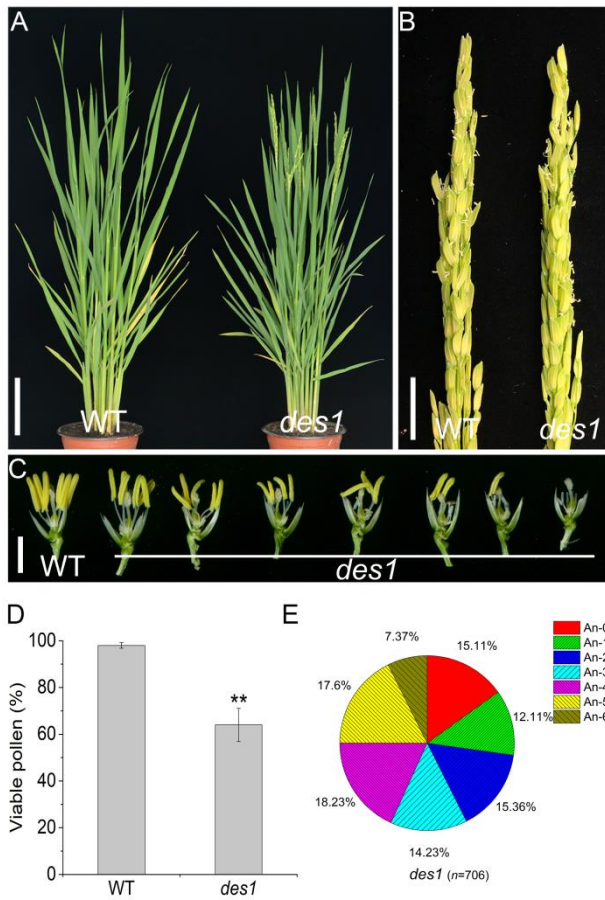

2

3

**Supplementary Fig. S1.** Phenotypic analysis in WT and *des1*. (A) WT and *des1* plants at the heading stage. Scale bar represents 20 cm. (B) Panicles of WT and *des1* plants at anthesis stage. Scale bar represents 2 cm. (C) Florets of WT and *des1*. The number of stamen is six in WT, and varied between zero to six in *des1*. The palea and lemma were removed for observation. Scale bar represents 2.5 mm. (D) Statistical analysis of viable pollen in WT and *des1*. Data are means  $\pm$ SD ( $n = 3$ ). (E) Frequency of stamen numbers in mature spikelets of *des1*. n, spikelet number. An 0-6 represents stamen numbers, respectively.

9

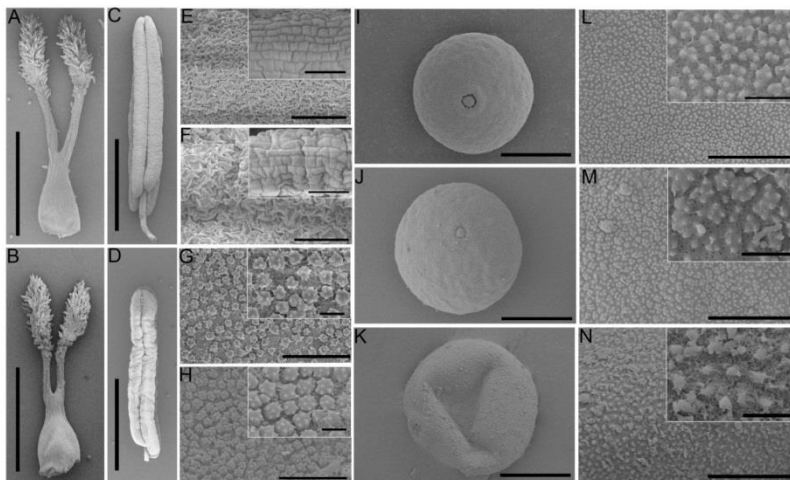

22 **Supplementary Fig. S2.** Scanning electron microscopy (SEM) observation of the mature pistils, anthers and  
 23 pollen grains in WT and *des1*. Comparisons of SEM observations in WT (A, C, E, G, I, L) and *des1* (B, D, F, H, J,  
 24 K, M, N) mature pistils (A, B), anthers (C, D), anther epidermis (E, F), anther inner surfaces (G, H), pollen grains,  
 25 (I, J, K), and pollen exine (L, M, N). Scale bars represent 1 mm in (A-D), 10  $\mu$ m in (E, F), 100  $\mu$ m in the enlarged  
 26 of (E, F), 5  $\mu$ m in (G, H, L, M, N), 1  $\mu$ m in the enlarged of (G, H, L, M, N), and 20  $\mu$ m in (I, J, K).

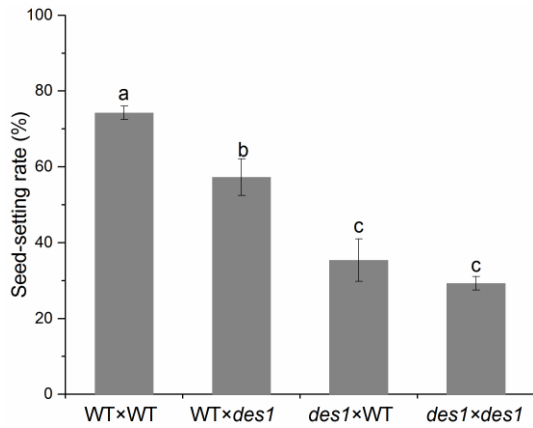

28  
 29 **Supplementary Fig. S3.** Statistical data of the seed-setting rate of the reciprocal crosses. Data are Means  $\pm$  SD  
 30 from 3 replicates with > 40 emasculated spikelets per replicate, and different letters indicate significant differences  
 31 as determined by Duncan's test ( $P < 0.05$ ).  
 32

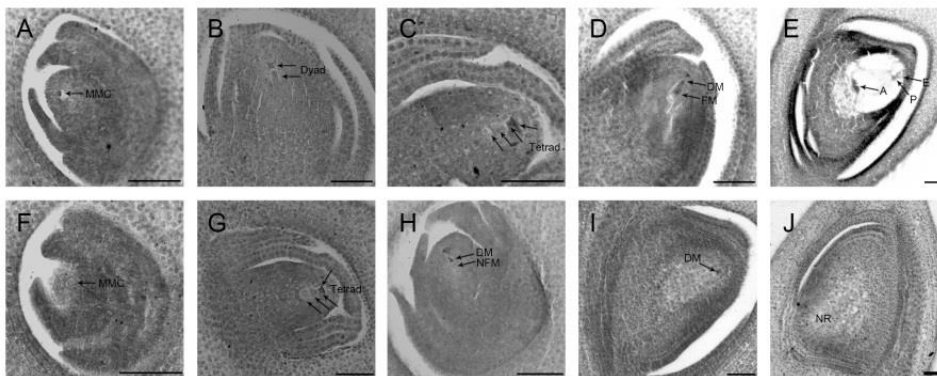

33  
 34 **Supplementary Fig. S4.** Paraffin section analysis of the embryo sac development in WT and *des1*. (A-E) Images  
 35 of embryo sacs in WT at megasporocyte stage (A), dyad (B), tetrad (C), functional megaspore formation stage (D)  
 36 and mature embryo sac stage (E), respectively. (F-H) Images of embryo sacs in *des1* at megasporocyte formation  
 37 stage (F), tetrad (G) and functional megaspore formation stage (H), respectively. Part (I) shows that the so-called  
 38 functional megaspore degenerated along with the other three megaspores in *des1*. Part (J) shows no embryo sac  
 39 formation in *des1*. MMC, megaspore mother cell; DM, degenerated megaspore; FM, functional megaspore; A,  
 40 antipodal cell; P, polar nucleus; E, egg cell; NFM, non-functional megaspore; NR, nucellar remnants. Bars = 50  
 41  $\mu$ m.

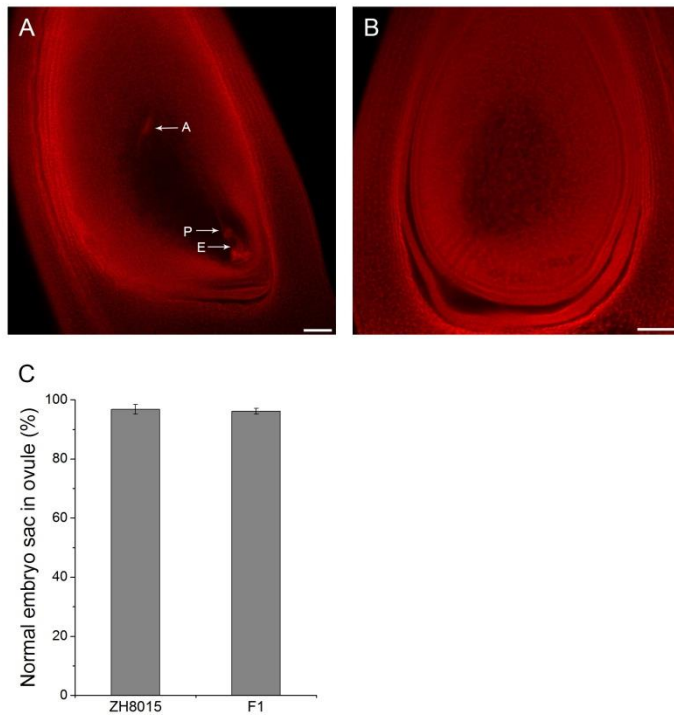

42

43 **Supplementary Fig. S5.** Microscopic observations of mature embryo sacs observations in ZH8015 and F<sub>1</sub> plants.

44 (A) The normal embryo sac at maturity. (B) The degenerated embryo sac at maturity. (C) Statistical analysis of

45 normal mature embryo sac formation in ZH8015 and F<sub>1</sub> plants. A, antipodal cell; P, polar nucleus; E, egg cell; S,

46 synergid cell. Scale bars represent 50 μm. (Ovule number: ZH8015: 169; F<sub>1</sub>: 179).

47

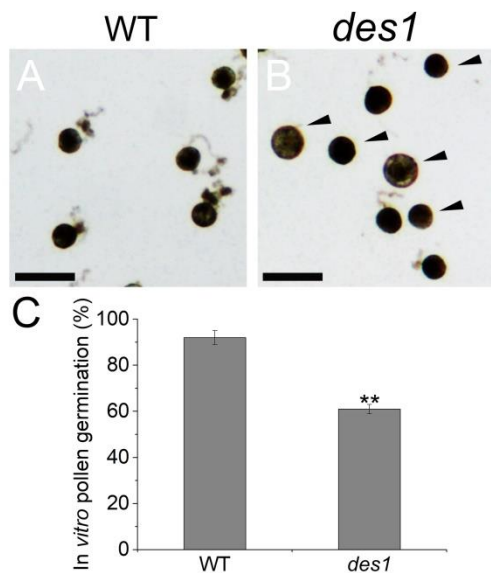

48

49 **Supplementary Fig. S6.** In vitro pollen germination assay. (A, B) Germination of WT and *des1* pollen grains *in*

50 *vitro*. Scale bars represent 10 μm. (C) Percentage of WT and *des1* pollen grain germination *in vitro*. Data are

51 means ±SD (n = 3). Arrows indicate the pollen grains that do not germinate *in vitro*.

52

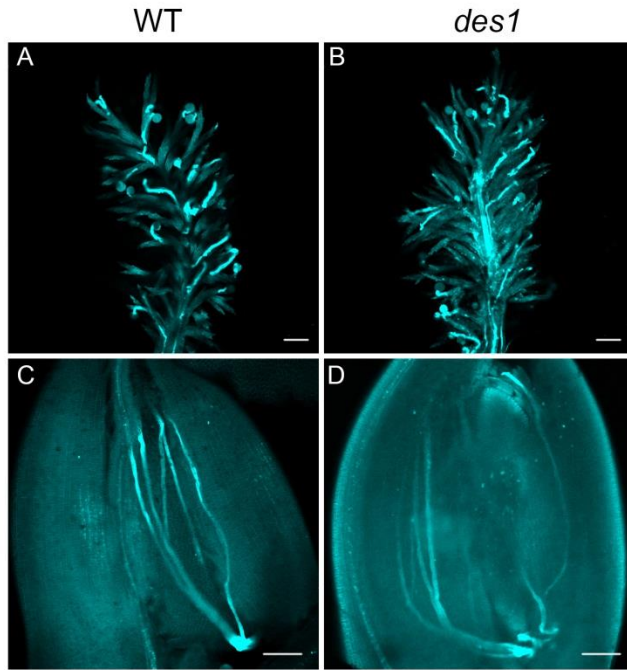

53

54 **Supplementary Fig. S7.** Pollen germination on the stigma and pollen tube growth in WT and *des1*. (A, B) Aniline  
 55 blue staining of pollen germination on the stigma at 2 h after pollination in WT (A) and *des1* (B). (C, D) Aniline  
 56 blue staining of pollen tube growth in the ovule at 2 h after pollination in WT (C) and *des1* (D). Scale bars  
 57 represent 100  $\mu\text{m}$ .

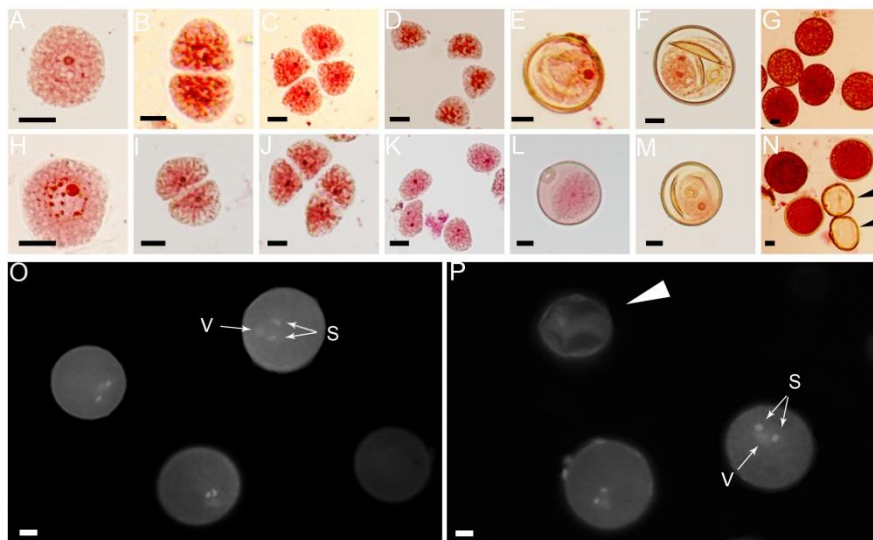

58

59 **Supplementary Fig. S8.** Male gametogenesis in WT and *des1* shown by aceto-carmine and DAPI staining. (A-N)  
 60 The process of microspore development in WT (A-G) and *des1* (H-N) shown by aceto-carmine staining. (O, P)  
 61 The process of microspore development in WT (O) and *des1* (P) shown by DAPI staining. Arrows indicate the  
 62 aborted microspores. (A, H) The pollen mother cell differentiation stage; (B, I) the dyad stage; (C, J) the tetrad  
 63 stage; (D, K) the early microspore stage; (E, L) the uninucleate stage; (F, M) the bicellular stage; (G, N) the mature  
 64 pollen stage; (O, P) the tricellular stage. S, sperm nuclei; V, vegetative nuclei. Scale bars represent 10  $\mu\text{m}$  in (A-P).

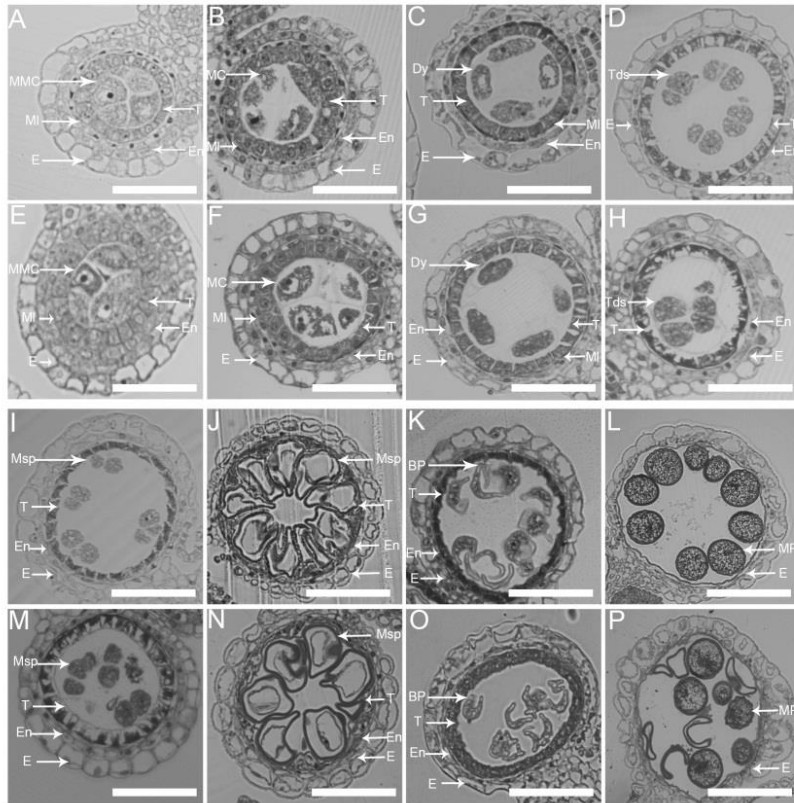

65

66 **Supplementary Fig. S9.** Transverse section observations of WT and *des1* anthers at various developmental stages.

67 Transverse section of WT (A-D), (I-L) and *des1* (E-H), (M-P) anthers. The transverse sections (A-P) were stained

68 with 0.25% toluidine blue. (A, E) Microspore mother cell stage; (B, F) the PMC pre-meiosis stage; (C, G) the dyad

69 stage; (D, H) the tetrad stage; (I, M) the early microspore stage; (J, N) the vacuolated microspore stage; (K, O) the

70 bicellular pollen stage; (L, P) the mature pollen stage. MMC, microspore mother cell; PMC, pollen mother cell; T,

71 tapetum; ML, middle layer; En, endothecium; E, epidermis; MC, meiotic cell; Dy, dyad cell; Tds, tetrads; Msp,

72 microspore parietal cell; Bp, bicellular pollen; Mp, mature pollen. Scale bars represent 25 μm in A-P.

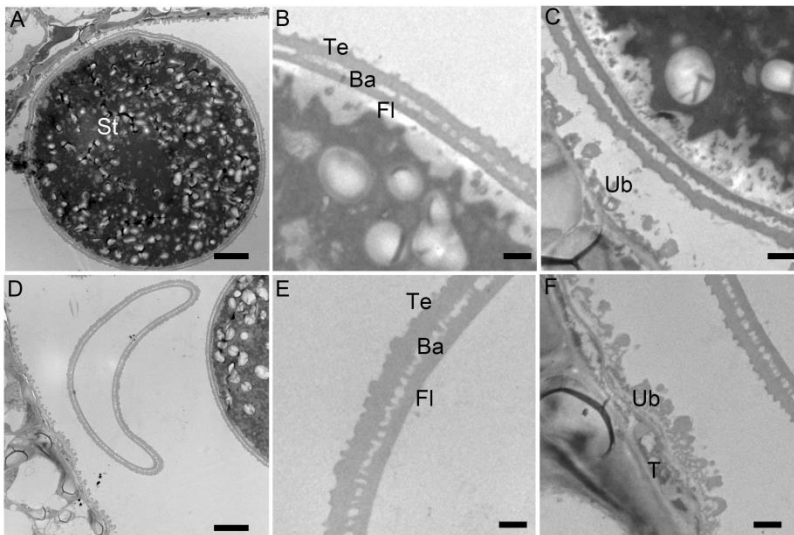

73

74 **Supplementary Fig. S10.** Transmission electron microscopy (TEM) observations of mature anthers in WT and

75 *des1*. Comparisons of TEM observations in the mature WT (A-C) and *des1* (D-F) pollen (A, D), pollen wall (B, E),

76 and tapetum (C, F). St, Starch granules; Fl, Foot layer; Ba, Baculum; Te, Tectum; Ub, Ubisch body; T, tapetum.  
 77 Scale bars represent 5  $\mu$ m in (A, D), and 1  $\mu$ m in (B, C, E, F).

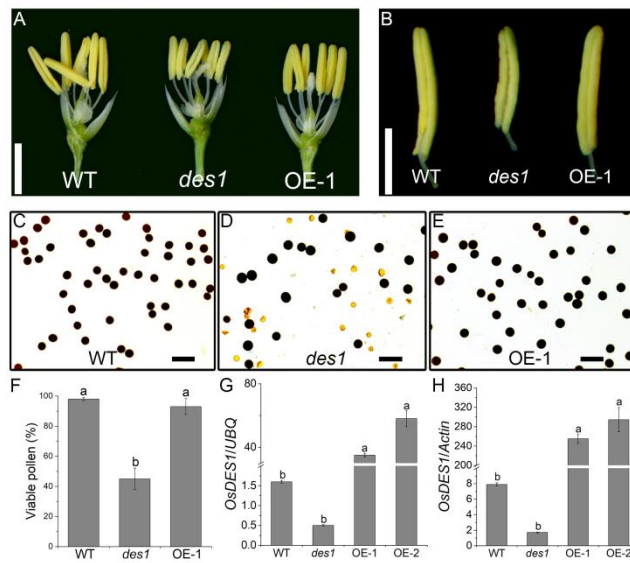

78  
 79 **Supplementary Fig. S11.** The anthers and pollen grains of WT, *des1*, and *OsDES1*-over-expression plants. (A, B)  
 80 Comparison of the spikelets (A) and anthers (B) in WT, *des1*, and OE-1 plants. The palea and lemma were  
 81 removed for observation. (C-E) I<sub>2</sub>-KI staining of pollen grains in WT, *des1*, and OE-1. (F) Statistical analysis of  
 82 pollen viability in WT, *des1*, and OE-1 plants. (G, H) Relative gene expression analysis in WT, *des1*, and  
 83 over-expression plants. Data are means  $\pm$  SD ( $n = 3$ ). Different letters indicate significant differences as  
 84 determined by Duncan's test ( $P < 0.05$ ). Scale bars represent 0.25 cm in (A), 0.125 cm in (B), and 25  $\mu$ m in (C-E).  
 85

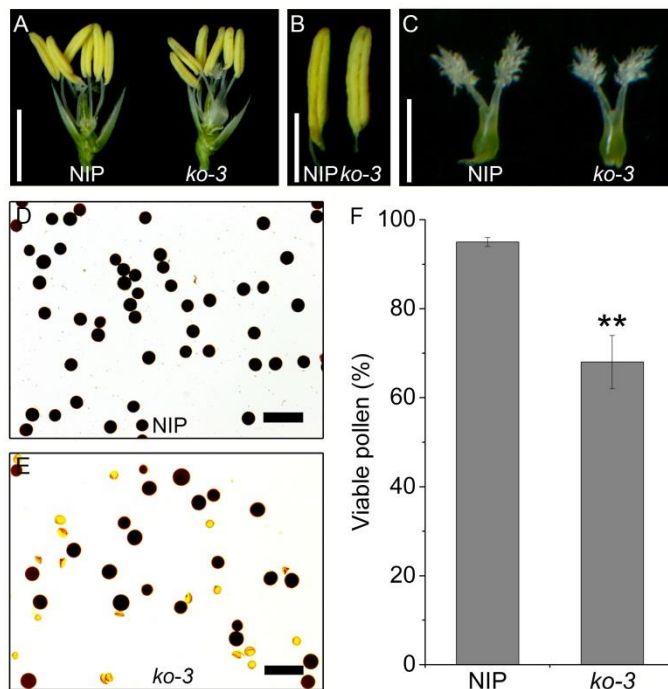

86  
 87 **Supplementary Fig. S12.** CRISPR-Cas9 characterization of *OsDES1*. (A) Comparison of NIP and *ko-3* spikelets.  
 88 The palea and lemma were removed for observation. Scale bar represents 2.5 mm. (B) Anthers of NIP and *ko-3*.

89 Scale bar represents 1.25 mm. (C) Pistils of NIP and *ko-3*. Scale bar represents 1.25 mm. (D, E) I<sub>2</sub>-KI staining of  
 90 pollen grains from NIP and *ko-3* plants. Scale bars represent 25 μm. (F) Statistical analysis of the percentage of  
 91 viable pollen in NIP and *ko-3* plants. Data are means ± SD (*n* = 3).  
 92

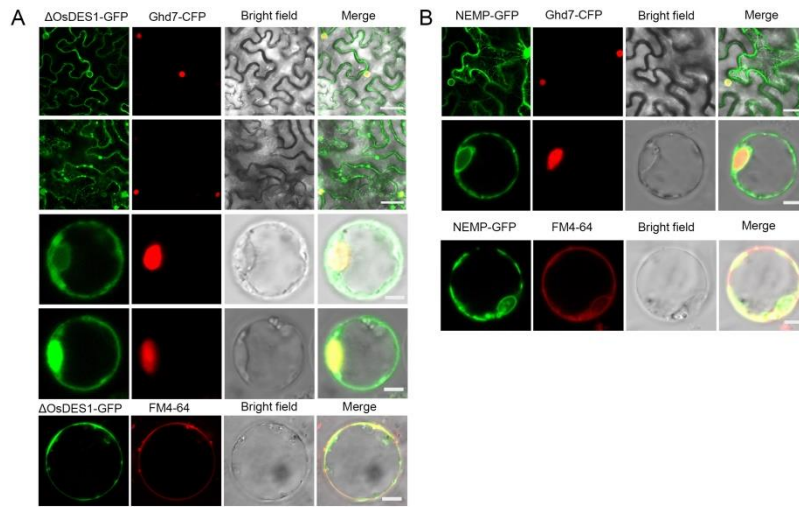

93  
 94 **Supplementary Fig. S13.** Subcellular localization of the  $\Delta$ OsDES1-GFP and NEMP-GFP fusion proteins. A.  
 95 Subcellular localization of the  $\Delta$ OsDES1-GFP in *N. benthamiana* leaf epidermal cells and rice protoplasts.  
 96  $\Delta$ OsDES1 represents the mutant OsDES1 protein. B. Subcellular localization of the NEMP-GFP in *N.*  
 97 *benthamiana* leaf epidermal cells and rice protoplasts. Nuclear envelop membrane protein (NEMP) domain was  
 98 located at amino acid residues 157-403. The Ghd7-CFP fusion protein was used as the nuclear marker. The plasma  
 99 membrane was stained with FM4-64. Scale bars represent 50 μm and 5 μm.

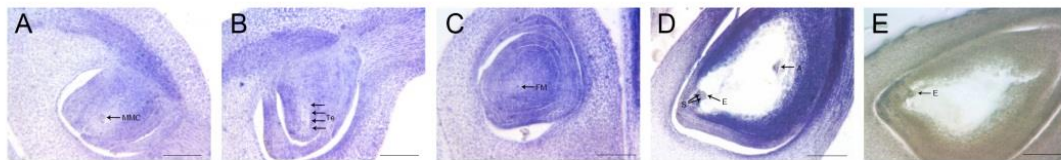

100  
 101 **Supplementary Fig. S14.** *In situ* analysis of *OsDES1* expression in longitudinal sections of the embryo sacs. (A)  
 102 Megasporocyte stage. (B) Tetrad. (C) Functional megaspore formation stage. (D) Mature embryo sac stage. (E)  
 103 Negative controls with the sense probe of the embryo sac at maturity. MMC, megaspore mother cell; Te, Tetrad;  
 104 FM, functional megaspore; A, antipodal cell; S, synergid cell; E, egg cell. Scale bar represents 100 μm.

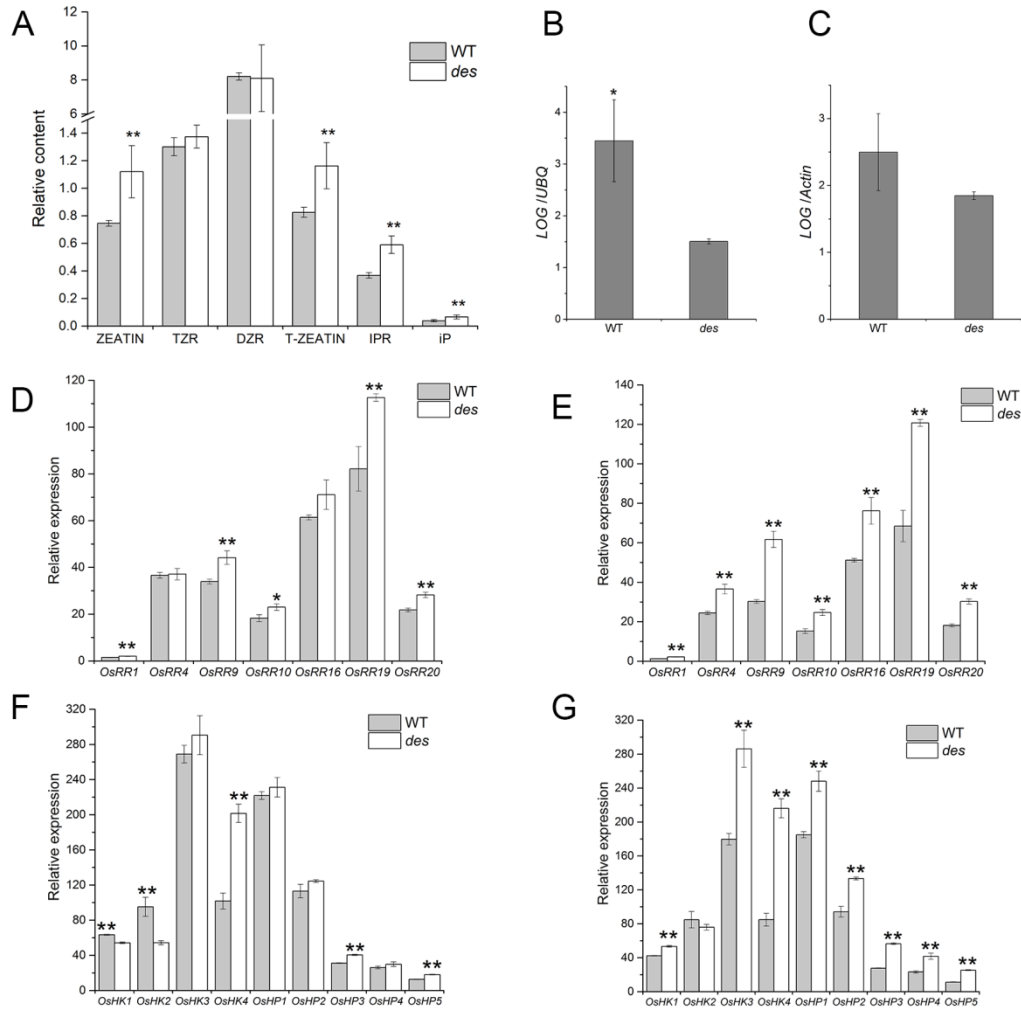

105

106

**Supplementary Fig. S15.** Cytokinin determination and cytokinin-related genes expression. (A) Statistical analysis of cytokinin contents. (B) and (C) *LOG* expression levels of the pistils of WT and *des1* at maturity. The *UBQ* and *Actin* gene were used as the inter controls, respectively. (D-G) Relative expression levels of cytokinin signal transduction-related genes between the pistils of WT and *des1* at maturity. The *UBQ* and *Actin* gene were used as the inter controls, respectively. Data are the means  $\pm$  SD of three independent biological replicates. Asterisks indicate a significant difference by Student's *t*-test (\*  $P < 0.05$ , \*\*  $P < 0.01$ ).

112 **Supplementary tables**

113

**Supplementary Table S1.** Statistical analysis of pollen tube growth observed in the ovule at 2 h after pollination in WT and *des1*.

114

| Line                    | WT  | <i>des1</i> |
|-------------------------|-----|-------------|
| Total                   | 44  | 51          |
| Ovules with pollen tube | 37  | 41          |
| Percent                 | 84% | 80%         |

115

Observation of pollen tube growth was defined as when at least one pollen tube in the ovule reached the micropyle at 2 h.

116

117

**Supplementary Table S2.** Oligonucleotide primers used in this study.

| Primer | Primer sequences (5'-3') | Purpose      |
|--------|--------------------------|--------------|
| 3-24-F | GCAACCCCTTCTCTCTCTCTC    | Fine mapping |
| 3-24-R | CCAAGGAGAGCGCACTAGC      |              |



|                |                                                     |                              |
|----------------|-----------------------------------------------------|------------------------------|
| X55-F          | AAGATTGAAGAAGCGGTCAAGC                              |                              |
| X55-R          | GCTTGCATGCATAGATTTCTCC                              |                              |
| H2-F           | CCTTGCTTCCCACCTTGA                                  |                              |
| H2-R           | TTGGTATTGCCGTTGCTT                                  |                              |
| H35-F          | CGAATAGGAACCGAGACT                                  |                              |
| H35-R          | TAAGGACGTGGGAGAGAG                                  |                              |
| H58-F          | ACCACCATACAGCACAGC                                  |                              |
| H58-R          | CATCACAAGTAGCAAGCC                                  |                              |
| H30-F          | CTGCCCTGGATACGTTAT                                  |                              |
| H30-R          | CCCTCGTGCTACTTTGAC                                  |                              |
| 3-31-F         | ACTAGAGCACCCCTCGCTGAG                               |                              |
| 3-31-R         | CTCAGCCACCCCATCAAC                                  |                              |
| OsDES1-SeqF    | AGGTGTATTCTTCTCGTAAGTGTGA                           | Sequencing for mutation site |
| OsDES1-SeqR    | GGATCATAAAGTGCAGAAATAATCAAG                         |                              |
| OsDES1GBD-1F   | TTCTGCACTAGGTACCTGCAGATGCCACCACCTCCACCGCCG          | Overexpression               |
| OsDES1GBD-1R   | TCTTAGAATTCCTGGGATCCTTAAACAGTCCGAACAAACGTTTC        |                              |
| 1132-OsDES1-F  | TCCCCGGGCTGCAGGAATTCATGCCACCACCTCCACCGC             |                              |
| 1132-OsDES1-R  | GGTACCGGGCCCCCTCGAGAAACAGTCCGAACAAACGTTTCC          |                              |
| 1132-△OsDES1-F | TCCCCGGGCTGCAGGAATTCATGCCACCACCTCCACCGC             | Subcellular localization     |
| 1132-△OsDES1-R | GGTACCGGGCCCCCTCGAGGGTCCAGCTAAGATCACACTTAC          |                              |
| 1132NEMPGFP-F  | TCCCCGGGCTGCAGGAATTCGGAGGAAGAGTCTTGCTTCACA          |                              |
| 1132NEMPGFP-R  | GGTACCGGGCCCCCTCGAGTTGAGACAATGCTTCCTTGACCG          |                              |
| LOG-AD-F       | GTTCCAGATTACGCTGGATCCATGGCAATGGAGGCTGCG             |                              |
| LOG-AD-R       | TTGATACCACCTGCTGGATCCTCAGGATGAGGTGATCCTGGTC         | Yeast two hybrid             |
| OsDES1-BD-F    | CAAAATATCTGCAATGGCCATTACGGCCATGCCACCACCTCCACCGC     |                              |
| OsDES1-BD-R    | CGAATTCCTGCAGATGGCCGAGGCGGCCCAAACAGTCCGAACAAACGTTTC |                              |
| GFP-OsDES1-F   | GATGAACTATACAAAGGCGCGCCAAATGCCACCACCTCCACCGC        |                              |
| GFP-OsDES1-R   | CGATCGGGAAATTCGAGCTCTTAAACAGTCCGAACAAACGTTTCC       | Co-IP                        |
| Myc-LOG-F      | AGAGGACTTGAATTCGGTACCCATGGCAATGGAGGCTGCG            |                              |
| Myc-LOG-R      | GTCTAGGCTACGTAGGATCCTCAGGATGAGGTGATCCTGGTC          |                              |
| nLUC-OsDES1-F  | GAGCTCGGTACCCGGGGATCCATGCCACCACCTCCACCGC            |                              |
| nLUC-OsDES1-R  | GCGTACGAGATCTGGTGCACAAACAGTCCGAACAAACGTTTCC         | Luciferase complementation   |
| eLUC-LOG-F     | GGGGCGGTACCCGGGGATCCATGGCAATGGAGGCTGCG              | imaging assay                |
| eLUC-LOG-R     | CGAAAGCTCTGCAGGTCGACTCAGGATGAGGTGATCCTGGTC          |                              |
| GUS-1F         | CAGTGAATTCGATAATAATTCGGCCAGGC                       | GUS                          |
| GUS-1R         | CGATCCATGGCGCGGGCGGATTGAGGGAT                       |                              |
| OsDES1-ZF      | AGCTATGAAACAACCTGGTCTCA                             |                              |
| OsDES1-ZR      | CAGCTTAAACAGTCCGAACAA                               |                              |
| LOG-F:         | TCCTAGGCAGCTATAGTAGTAGG                             |                              |
| LOG-R:         | TGTAAGATTGTTGTTCCGTTCCG                             | qRT-PCR                      |
| OsHK1-F        | GATGTACTTGATCGGGCTAAGA                              |                              |
| OsHK1-R        | ATCACATCATCCATGAGAGACC                              |                              |
| OsHK2-F        | CATTTGAGGATTTACGGCTAG                               |                              |
| OsHK2-R        | CTTTTGCTCAAACTCCCTT                                 |                              |

|            |                         |                                  |
|------------|-------------------------|----------------------------------|
| OsHK3-F    | GTTTCATGGACATACAGATGCC  |                                  |
| OsHK3-R    | ATAGCCATCCATTTTCGCTTTTC |                                  |
| OsHK4-F    | CTGCTGTACACCAAGAGAGTAA  |                                  |
| OsHK4-R    | CTCTCATTGATCGCATCCTC    |                                  |
| OsHP1-F    | GACAGGATCATCAACGAGATCG  |                                  |
| OsHP1-R    | CCTTTGAGCTGATGAACGTAGG  |                                  |
| OsHP2-F    | GTGAAGAACAACCTTGCATTAGT |                                  |
| OsHP2-R    | CACCAAATCCAAAGTCTTGAGG  |                                  |
| OsHP3-F    | AGGTGGGATACATATATGCAGC  |                                  |
| OsHP3-R    | GACATGCACTCATTCTTCATCC  |                                  |
| OsHP4-F    | CAATTGAAAGGCAGCTGTCTTA  |                                  |
| OsHP4-R    | CCTCTCACTTTCTGGAAGGAT   |                                  |
| OsHP5-F    | GAAGAATGAGTGCTCTGTGTTC  |                                  |
| OsHP5-R    | CTTGAGCTCACTGCATAATCAC  |                                  |
| OsRR1-F    | GTCATGTCGTCGAAAACG      |                                  |
| OsRR1-R    | CCTTGCTTTGAAGAGGCTTTAC  |                                  |
| OsRR4-F    | CTCAAGAAGCTCGCTACCAAG   |                                  |
| OsRR4-R    | CTCTTGAGCAGATCATAACCTG  |                                  |
| OsRR9-F    | AACATATCTGTGCTAGCTTTGC  |                                  |
| OsRR9-R    | AAAGAAGAGGCTTTGAGTAGCC  |                                  |
| OsRR10-F   | GTAGCCTCTTCTTCTGTCTT    |                                  |
| OsRR10-R   | AAAGAAGAGGCTTTGAGTAGCC  |                                  |
| OsRR16-F   | CGTTGACATGTACAGTGGATTC  |                                  |
| OsRR16-R   | GATAACTGGGTAAGTCTCAGG   |                                  |
| OsRR19-F   | GTCTTGCAACTTCTCAACCAT   |                                  |
| OsRR19-R   | TCTGTCTTAAGAACCAGGTG    |                                  |
| OsRR20-F   | GGAGAGACAAAGACTGTGATGA  |                                  |
| OsRR20-R   | TACCGAACTTCTCCTAACAAC   |                                  |
| UBQ-F      | GCTCCGTGGCGGTATCAT      |                                  |
| UBQ-R      | CGGCAGTTGACAGCCCTAG     |                                  |
| Actin-F    | TGCTATGTACGTCGCCATCCAG  |                                  |
| Actin-R    | AATGAGTAACCACGCTCCGTCA  |                                  |
| InOsDES1-F | GGGTCCTCGATTTCCGGATG    |                                  |
| InOsDES1-R | AGACTCGCTAAGAGTGTGCG    | RNA <i>in situ</i> hybridization |
